# Supplementary material for: Effect of airtime incentives on response and cooperation rates in non-communicable disease interactive voice response surveys: randomised controlled trials in Bangladesh and Uganda
Source: PubMed Central journal article supplement — BMJ Glob Health. 2019 Sep 6;4(5):e001604. doi: 10.1136/bmjgh-2019-001604 (PMC6747927; doi:10.1136/bmjgh-2019-001604), 2019-09-06
Supplement: bmjgh-2019-001604supp001.pdf [file bmjgh-2019-001604supp001.pdf]

## Supplementary material

### Appendix 1. Equations used to calculate survey rates

|                    |                     | Equation                                              |
|--------------------|---------------------|-------------------------------------------------------|
| Primary analysis   | Contact Rate #2     | $(I + P + R + O) / (I + P + R + O + NC + e(UH + UO))$ |
|                    | Response Rate #4    | $(I + P) / (I + P + R + O + NC + e(UH + UO))$         |
|                    | Refusal Rate #2     | $R / (I + P + R + O + NC + e(UH + UO))$               |
|                    | Cooperation Rate #1 | $I / (I + P + R + O)$                                 |
| Secondary analysis | Contact Rate #1     | $(I + P + R + O) / (I + P + R + O + NC + UH + UO)$    |
|                    | Response Rate #2    | $(I + P) / (I + P + R + O + NC + UH + UO)$            |
|                    | Refusal Rate #1     | $R / (I + P + R + O + NC + UH + UO)$                  |
|                    | Cooperation Rate #2 | $(I + P) / (I + P + R + O)$                           |

Abbreviations: I, interview; P, partial interview; R, refusal/break-off; O, other; NC, non-contact; UH, unknown household; UO, unknown other; *e*, estimated proportion of unknown cases that were age-eligible
