# Supplementary material for: Effect of airtime incentives on response and cooperation rates in non-communicable disease interactive voice response surveys: randomised controlled trials in Bangladesh and Uganda
Source: PubMed Central journal article supplement — BMJ Glob Health. 2019 Sep 6;4(5):e001604. doi: 10.1136/bmjgh-2019-001604 (PMC6747927; doi:10.1136/bmjgh-2019-001604), 2019-09-06
Supplement: bmjgh-2019-001604supp002.pdf [file bmjgh-2019-001604supp002.pdf]

## Supplementary material

Appendix 2 Demographic characteristics of complete and partial interviews in Bangladesh and Uganda

|                            | Bangladesh                       |                             |         | Uganda                           |                             |         |
|----------------------------|----------------------------------|-----------------------------|---------|----------------------------------|-----------------------------|---------|
|                            | Complete Interviews<br>N = 1,085 | Partial Interviews<br>N=534 | p-value | Complete Interviews<br>N = 1,202 | Partial Interviews<br>N=393 | p-value |
| <b>Sex (male)</b>          | 952 (87.7%)                      | 490 (89.9%)                 | 0.174   | 910 (77.7%)                      | 282 (74.0%)                 | 0.138   |
| <b>Age group (years)</b>   |                                  |                             |         |                                  |                             |         |
| 18-29                      | 759 (70.0%)                      | 362 (67.8%)                 | 0.546   | 900 (76.9%)                      | 291 (76.2%)                 | 0.846   |
| 30-49                      | 273 (25.2%)                      | 137 (25.7%)                 |         | 246 (21.0%)                      | 81 (21.2%)                  |         |
| 50-69                      | 25 (2.3%)                        | 16 (3.0%)                   |         | 19 (1.6%)                        | 7 (1.8%)                    |         |
| 70+                        | 28 (2.6%)                        | 19 (3.6%)                   |         | 5 (0.4%)                         | 3 (0.8%)                    |         |
| Missing*                   | n=0                              | n=0                         |         | n=32                             | n=11                        |         |
| <b>Education attempted</b> |                                  |                             |         |                                  |                             |         |
| None                       | 79 (21.9%)                       | 56 (27.7%)                  | 0.298   | 193 (16.4%)                      | 67 (17.4%)                  | 0.855   |
| Primary                    | 280 (77.6%)                      | 145 (71.8%)                 |         | 303 (25.7%)                      | 91 (23.6%)                  |         |
| Secondary                  | NA                               | NA                          |         | 458 (38.9%)                      | 154 (39.9%)                 |         |
| Tertiary or higher         | NA                               | NA                          |         | 224 (19.0%)                      | 74 (19.2%)                  |         |
| Refused                    | 2 (0.6%)                         | 1 (0.5%)                    |         | 0 (0.0%)                         | 0 (0.0%)                    |         |
| Missing*†                  | n=724                            | n=332                       |         | n=24                             | n=7                         |         |
| <b>Location</b>            |                                  |                             |         |                                  |                             |         |
| Urban                      | 563 (51.9%)                      | 286 (53.6%)                 | 0.781   | 677 (57.5%)                      | 215 (55.7%)                 | 0.542   |
| Rural                      | 519 (47.8%)                      | 247 (46.3%)                 |         | 501 (42.5%)                      | 171 (44.3%)                 |         |
| Refused                    | 3 (0.3%)                         | 1 (0.2%)                    |         | 0 (0.0%)                         | 0 (0.0%)                    |         |
| Missing*                   | n=0                              | n=0                         |         | n=24                             | n=7                         |         |
| <b>Language</b>            |                                  |                             |         |                                  |                             |         |
| Bangla                     | 1,074 (99.0%)                    | 525 (98.3%)                 | 0.250   | NA                               | NA                          | 0.482   |
| English                    | 11 (1.0%)                        | 9 (1.7%)                    |         | 201 (16.7%)                      | 68 (17.3%)                  |         |
| Luganda                    | NA                               | NA                          |         | 714 (59.4%)                      | 240 (61.1%)                 |         |
| Luo                        | NA                               | NA                          |         | 103 (8.6%)                       | 24 (6.1%)                   |         |
| Runyakitara                | NA                               | NA                          |         | 184 (15.3%)                      | 61 (15.5%)                  |         |
|                            |                                  |                             |         |                                  |                             |         |

Data are n (%). \*Missing values for Uganda are due to errors in platform that prevented storing data. †Missing values for Bangladesh are due to incorrect coding of IVR platform. UGX, Ugandan Shilling; NA, not applicable.
