# Supplementary material for: Effect of airtime incentives on response and cooperation rates in non-communicable disease interactive voice response surveys: randomised controlled trials in Bangladesh and Uganda
Source: PubMed Central journal article supplement — BMJ Glob Health. 2019 Sep 6;4(5):e001604. doi: 10.1136/bmjgh-2019-001604 (PMC6747927; doi:10.1136/bmjgh-2019-001604), 2019-09-06
Supplement: bmjgh-2019-001604supp003.pdf [file bmjgh-2019-001604supp003.pdf]

## Supplementary material

**Appendix 3.** Secondary analysis of contact, response, refusal, and cooperation rates using alternative equations from the American Association of Public Opinion Research by study arm in Bangladesh and Uganda

|                     | Bangladesh  |                  |                  | Uganda      |                  |                  |
|---------------------|-------------|------------------|------------------|-------------|------------------|------------------|
|                     | Control     | 50 Taka          | 100 Taka         | Control     | 5000 UGX         | 10,000 UGX       |
| Contact Rate #1     | 32.6%       | 36.1%            | 33.9%            | 51.4%       | 51.8%            | 51.5%            |
| Risk Ratio (95%CI)  | <i>Ref.</i> | 1.11 (1.04–1.19) | 1.04 (0.97–1.12) | <i>Ref.</i> | 1.01 (0.94–1.08) | 1.00 (0.94–1.07) |
| p-value             | <i>Ref.</i> | 0.0029           | 0.2508           | <i>Ref.</i> | 0.8098           | 0.9381           |
| Response Rate #2    | 15.4%       | 19.4%            | 19.9%            | 33.6%       | 37.6%            | 38.5%            |
| Risk Ratio (95%CI)  | <i>Ref.</i> | 1.26 (1.13–1.40) | 1.29 (1.16–1.44) | <i>Ref.</i> | 1.12 (1.01–1.23) | 1.15 (1.04–1.26) |
| p-value             | <i>Ref.</i> | <0.0001          | <0.0001          | <i>Ref.</i> | 0.0242           | 0.0051           |
| Refusal Rate #1     | 17.2%       | 16.8%            | 14.0%            | 17.8%       | 14.3%            | 13.0%            |
| Risk Ratio (95%CI)  | <i>Ref.</i> | 0.98 (0.87–1.09) | 0.82 (0.73–0.92) | <i>Ref.</i> | 0.80 (0.68–0.95) | 0.73 (0.62–0.87) |
| p-value             | <i>Ref.</i> | 0.6629           | 0.0007           | <i>Ref.</i> | 0.0099           | 0.0004           |
| Cooperation Rate #2 | 47.3%       | 53.7%            | 58.7%            | 65.4%       | 72.5%            | 74.7%            |
| Risk Ratio (95%CI)  | <i>Ref.</i> | 1.13 (1.04–1.23) | 1.24 (1.15–1.35) | <i>Ref.</i> | 1.11 (1.04–1.18) | 1.14 (1.07–1.22) |
| p-value             | <i>Ref.</i> | 0.0030           | <0.0001          | <i>Ref.</i> | 0.0027           | 0.0001           |

Equations for each of the survey rates are provided in Appendix A. Abbreviations: UGX, Ugandan Shilling
