# Supplementary material for: Effect of airtime incentives on response and cooperation rates in non-communicable disease interactive voice response surveys: randomised controlled trials in Bangladesh and Uganda
Source: PubMed Central journal article supplement — BMJ Glob Health. 2019 Sep 6;4(5):e001604. doi: 10.1136/bmjgh-2019-001604 (PMC6747927; doi:10.1136/bmjgh-2019-001604), 2019-09-06

**Supplementary material**

**Appendix 4** Response and cooperation rates by time of day in Bangladesh and Uganda

**Bangladesh**

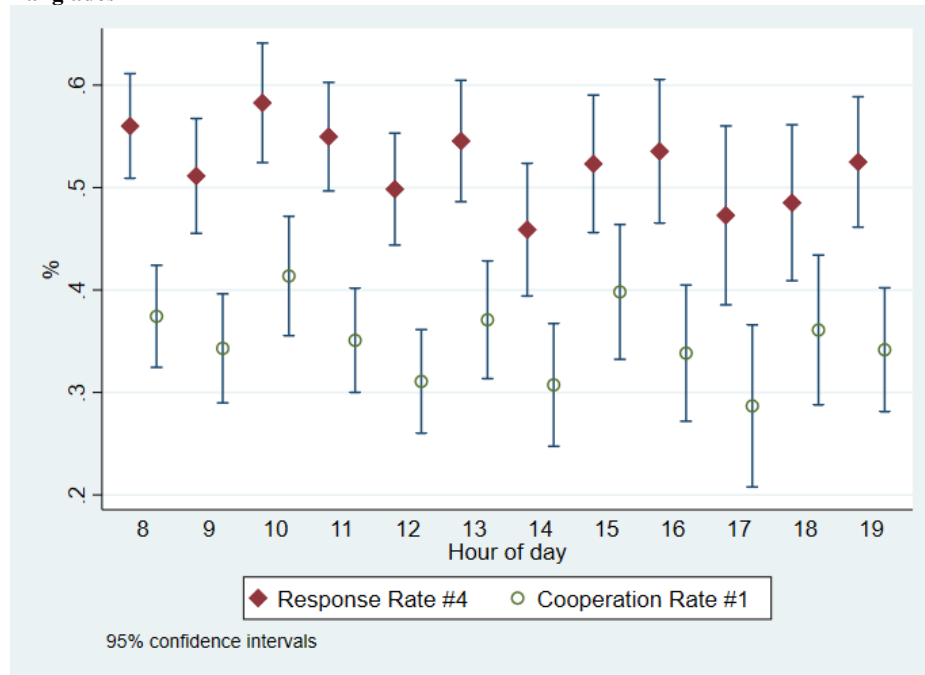

**Uganda**

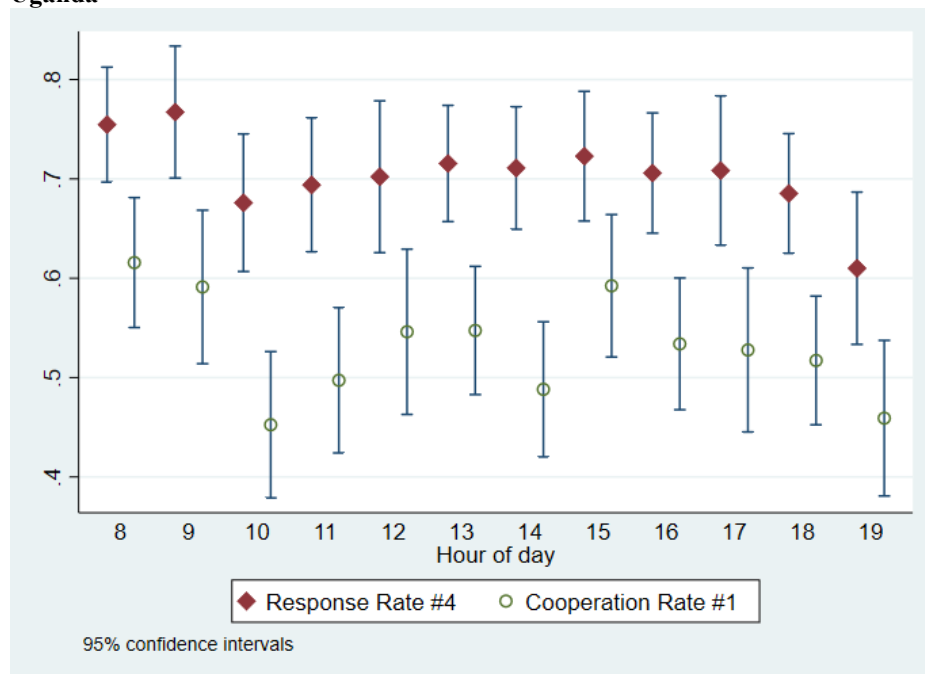

Supplement: bmjgh-2019-001604supp004.pdf [file bmjgh-2019-001604supp004.pdf]
