# Supplementary material for: Effect of airtime incentives on response and cooperation rates in non-communicable disease interactive voice response surveys: randomised controlled trials in Bangladesh and Uganda
Source: PubMed Central journal article supplement — BMJ Glob Health. 2019 Sep 6;4(5):e001604. doi: 10.1136/bmjgh-2019-001604 (PMC6747927; doi:10.1136/bmjgh-2019-001604), 2019-09-06
Supplement: bmjgh-2019-001604supp005.pdf [file bmjgh-2019-001604supp005.pdf]

## Supplementary material

### Appendix 5. Participants responses to NCD survey questions by study arm in Bangladesh and Uganda

#### Bangladesh

| Indicator                                  | Control         | 50 Taka         | 100 Taka        | p-value |
|--------------------------------------------|-----------------|-----------------|-----------------|---------|
| Current smoker                             | 144/339 (42.5%) | 142/362 (39.2%) | 165/351 (47.0%) | 0.109   |
| Current smokeless tobacco                  | 62/348 (17.8%)  | 69/366 (18.9%)  | 54/357 (15.1%)  | 0.394   |
| Alcohol abstainer                          | 277/348 (79.6%) | 293/362 (80.9%) | 275/355 (77.5%) | 0.512   |
| Current alcohol drinker                    | 23/348 (6.6%)   | 25/362 (6.9%)   | 27/355 (7.6%)   | 0.868   |
| No fruit in past week                      | 58/351 (16.5%)  | 52/366 (14.2%)  | 44/360 (12.2%)  | 0.261   |
| No vegetables in past week                 | 28/335 (8.4%)   | 27/353 (7.7%)   | 26/344 (7.6%)   | 0.914   |
| No vigorous physical activity in past week | 132/346 (38.2%) | 138/363 (38.0%) | 127/357 (35.6%) | 0.726   |
| No moderate physical activity in past week | 108/345 (31.3%) | 131/363 (36.1%) | 109/351 (31.1%) | 0.271   |
| Had blood pressure measured                | 155/336 (46.1%) | 190/362 (52.5%) | 187/352 (53.1%) | 0.129   |
| Had hypertension diagnosis                 | 38/333 (11.4%)  | 52/362 (14.3%)  | 40/351 (11.4%)  | 0.385   |
| Had diabetes diagnosis                     | 27/340 (7.9%)   | 19/362 (5.3%)   | 20/357 (5.6%)   | 0.281   |

#### Uganda

| Indicator                                  | Control         | 5000 UGX        | 10,000 UGX      | p-value |
|--------------------------------------------|-----------------|-----------------|-----------------|---------|
| Current smoker                             | 28/345 (8.1%)   | 31/371 (8.4%)   | 34/378 (9.0%)   | 0.907   |
| Current smokeless tobacco                  | 20/358 (5.6%)   | 26/380 (6.8%)   | 33/398 (8.3%)   | 0.343   |
| Alcohol abstainer                          | 151/366 (41.3%) | 163/395 (41.3%) | 178/410 (43.4%) | 0.776   |
| Current alcohol drinker                    | 108/365 (29.6%) | 135/395 (34.2%) | 125/409 (30.6%) | 0.350   |
| No fruit in past week                      | 102/373 (27.4%) | 100/402 (24.9%) | 92/418 (22.0%)  | 0.219   |
| No vegetables in past week                 | 88/363 (24.2%)  | 92/399 (23.1%)  | 79/413 (19.1%)  | 0.192   |
| No vigorous physical activity in past week | 102/375 (27.2%) | 89/397 (22.4%)  | 112/415 (27.0%) | 0.219   |
| No moderate physical activity in past week | 76/370 (20.5%)  | 73/397 (18.4%)  | 60/414 (14.5%)  | 0.078   |
| Had blood pressure measured                | 217/363 (59.7%) | 212/384 (55.2%) | 237/394 (60.2%) | 0.302   |
| Had hypertension diagnosis                 | 39/363 (10.7%)  | 33/384 (8.6%)   | 41/394 (10.4%)  | 0.566   |
| Had diabetes diagnosis                     | 18/361 (5.0%)   | 20/393 (5.1%)   | 24/405 (5.9%)   | 0.814   |

Abbreviations: UGX, Ugandan Shilling
